# Supplementary material for: Stabilisation of high-valent Cu3+ in a Keggin-type polyoxometalate
Source: Royal Society of Chemistry journal article supplement (doi:10.1039/c9cc09235h), 2020-01-01
Supplement: c9cc09235h1.pdf [file c9cc09235h1.pdf]

## Supporting Information

### Stabilisation of high-valent Cu<sup>3+</sup> in a Keggin-type polyoxometalate

Xiang Li,<sup>a</sup> Yuanhang Ren,<sup>a</sup> Zhewei Weng,<sup>a</sup> Bin Yue<sup>a\*</sup> and Heyong He<sup>a\*</sup>

**The characterisation details, ESI-MS results, IR spectra and TG curve of 1-Cs, XPS spectra of 1-Cs and 2-Cs are provided here.**

#### General characterisation methods

XRD patterns were recorded on a Bruker D2 Advance diffractometer with Cu  $K\alpha$  radiation ( $\lambda = 1.5418 \text{ \AA}$ ) operated at 10 mA and 30 kV. The scanning rate was  $3^\circ \cdot \text{min}^{-1}$  from 5 to  $90^\circ$ . The FT-IR spectra were recorded in the range of 4000-500  $\text{cm}^{-1}$  with a Nicolet Nexus 470 FTIR spectrometer using KBr pellets. Elemental analysis was performed on a Thermo Elemental IRIS Intrepid ICP atomic emission spectrometer. XPS measurements were conducted in the range of 0-1100 eV under a pressure of  $1.0 \times 10^{-6} \text{ Pa}$  on a PerkinElmer PHI 5000C ESCA X-ray photoelectron spectrometer using Mg  $K\alpha$  radiation (1253.6 eV). Calibration was conducted with the contaminant carbon (C 1s = 284.6 eV). UV-Vis diffuse reflectance spectra were recorded with a Lambda 650S UV-Vis spectrometer. Thermogravimetric analysis was performed on a Mettler Toledo TGA/DSC 3+ thermogravimetric analyser in a range of 40~700  $^\circ\text{C}$  with a temperature rising rate of 10  $^\circ\text{C}/\text{min}$ .

#### Magic angle spinning solid-state nuclear magnetic resonance spectroscopy (MAS NMR)

The  $^{31}\text{P}$  MAS NMR spectra were recorded on a Bruker AVANCE III 400WB spectrometer at 162.1 MHz with a spinning rate of 12 kHz and 85%  $\text{H}_3\text{PO}_4$  as the standard. The pulse width was 1.1  $\mu\text{s}$  and the relaxation delay was 15 s. The sample was dried *in vacuo* and then transferred into a Bruker 4 mm zirconia rotor under nitrogen atmosphere.

#### Electrospray ionisation mass spectrometry

The mass spectrometry was conducted on a Bruker MicrOTOF II mass spectrometry in the  $m/z$  range of 1200-6000 with a capillary voltage of 4000 V and an electrospray ionisation (ESI) source. The mode was negative ion. The nebuliser pressure was 1.0 bar and the dry heater temperature was 180  $^\circ\text{C}$  with a dry gas flow of 4.0  $\text{L} \cdot \text{min}^{-1}$ .

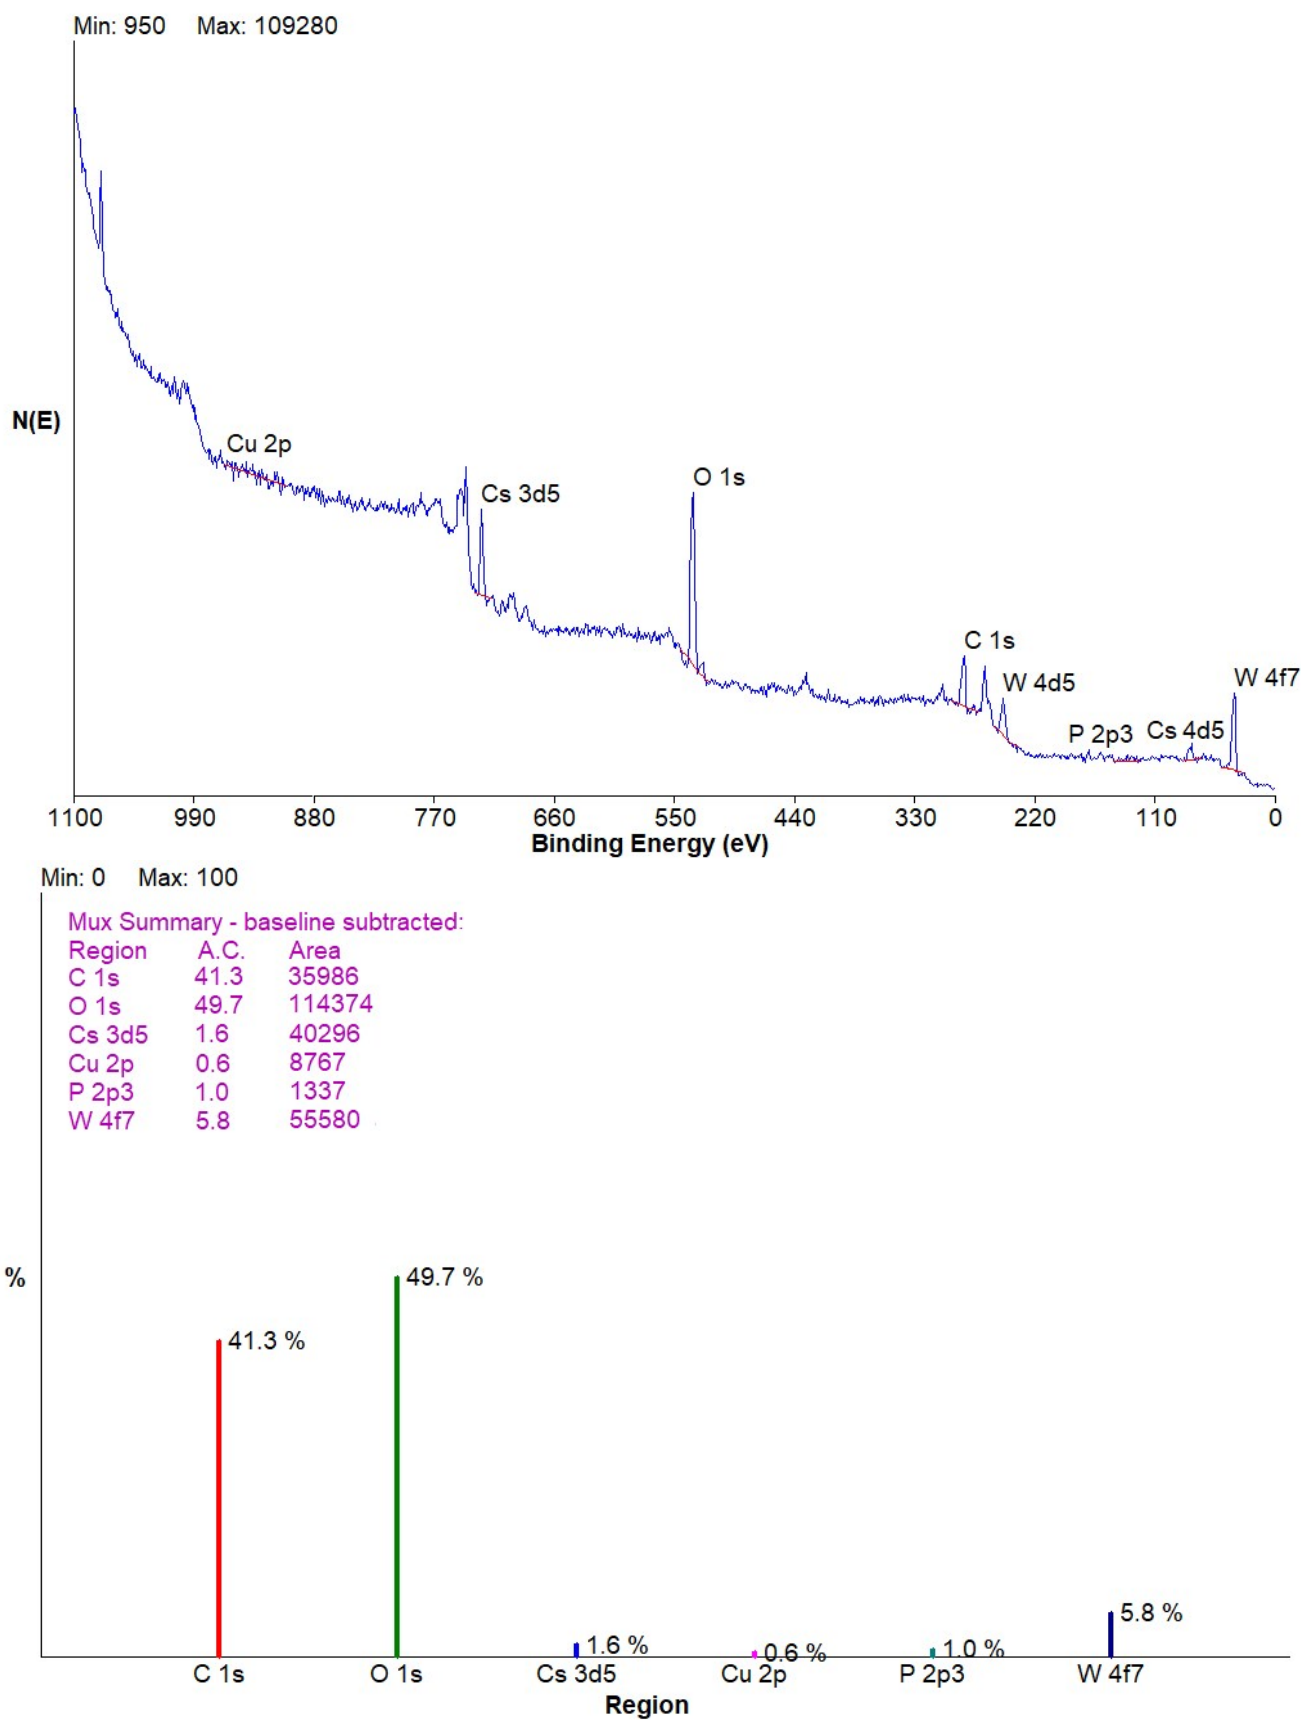

Fig. S1 XPS survey spectrum and the corresponding quantitative result of **1-Cs**.

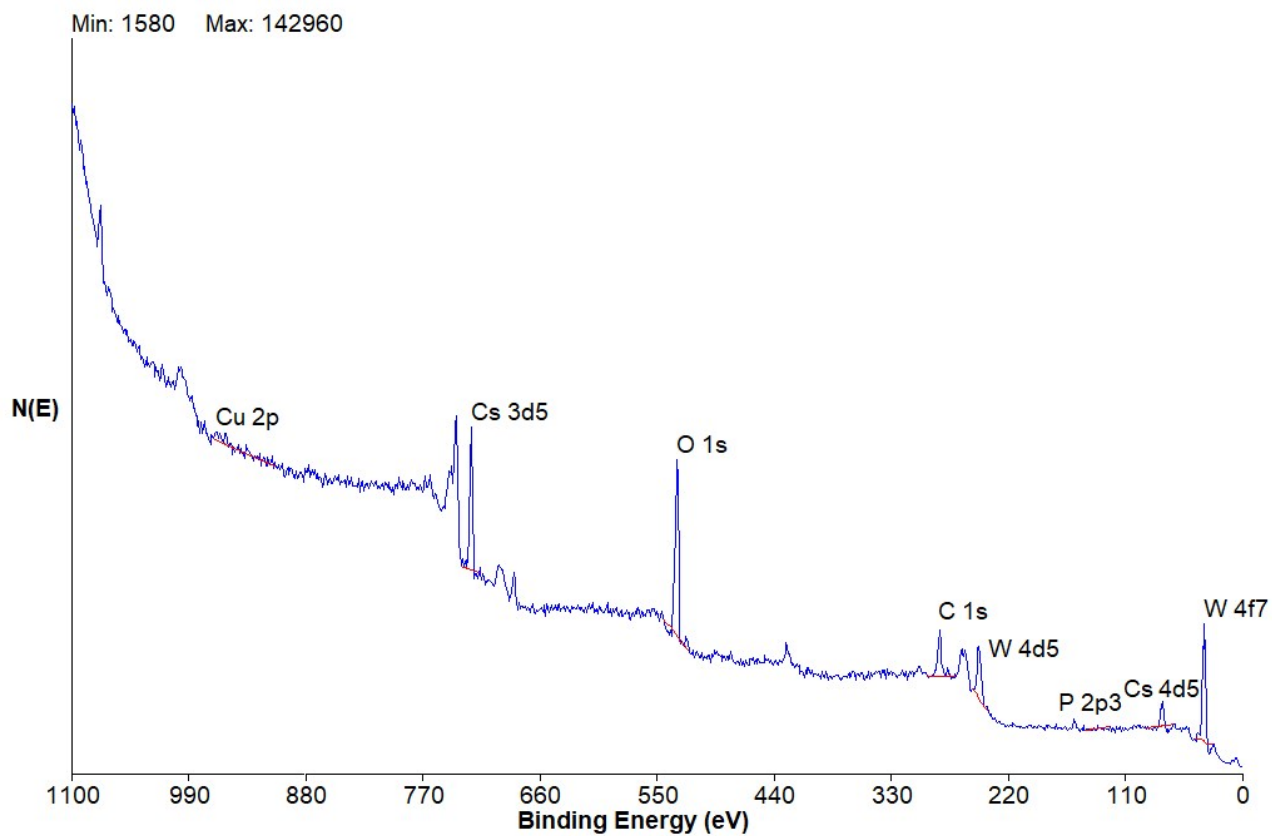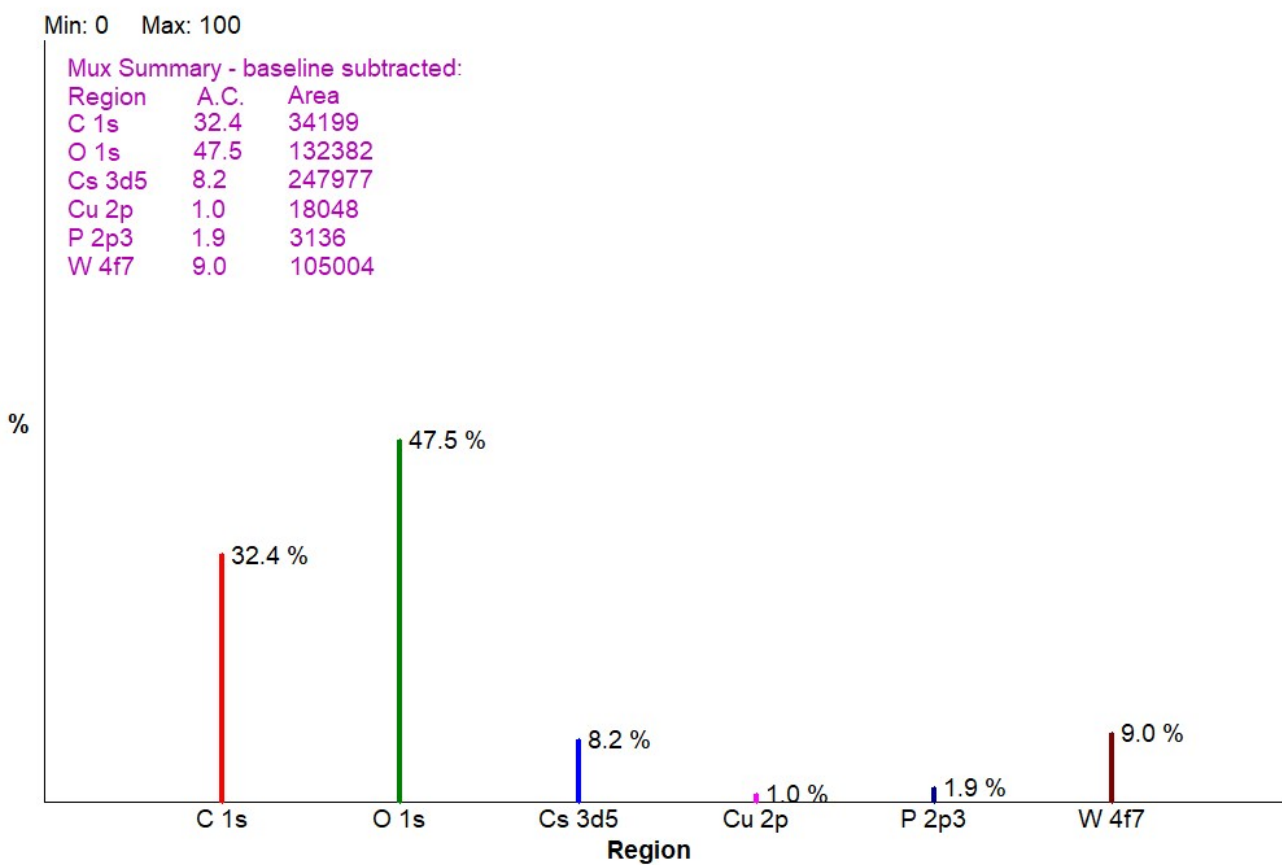

Fig. S2 XPS survey spectrum and the corresponding quantitative result of **2-Cs**.

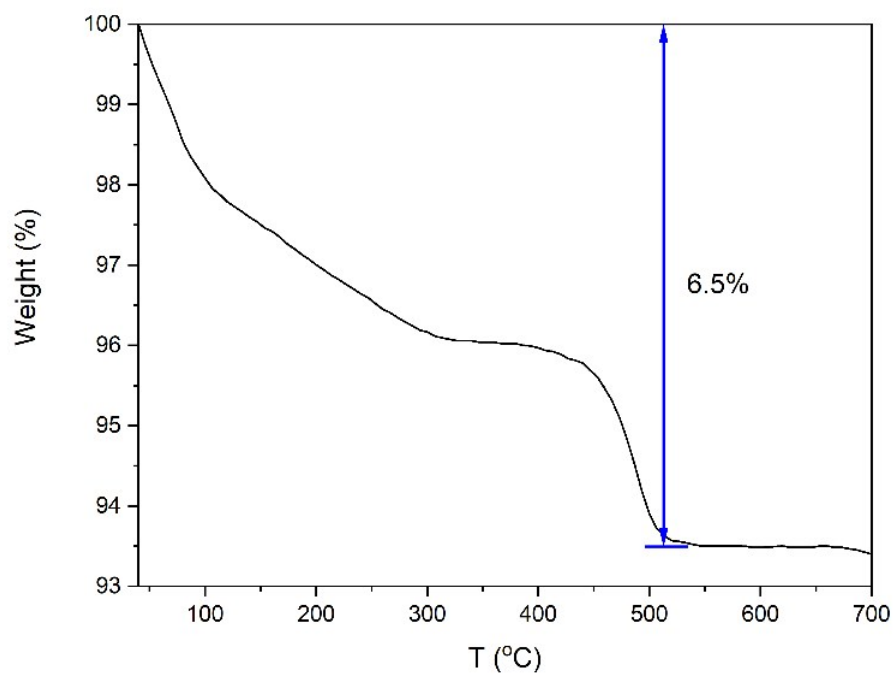

Fig. S3 TG curve of **1-Cs**.

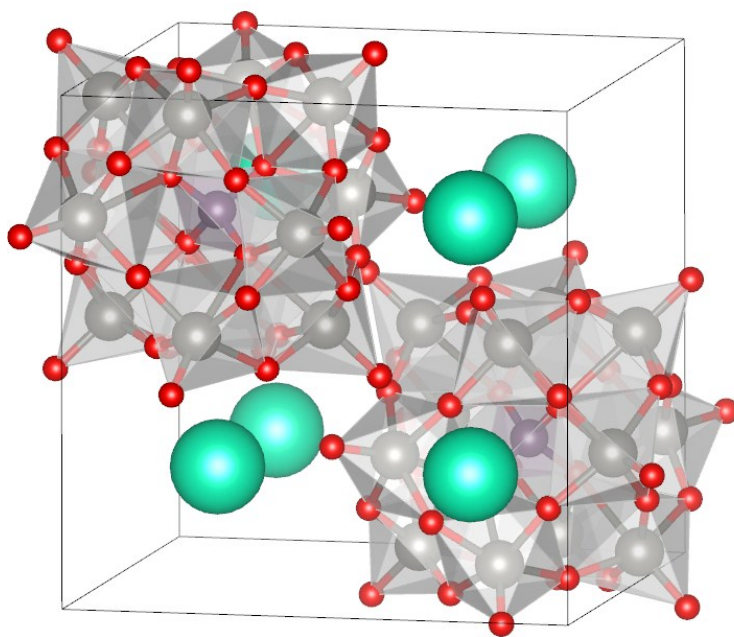

Fig. S4 Crystal structure of **3-Cs**.<sup>A1,A2</sup> The structure of **1-Cs** is very similar to that of **3-Cs** with the only difference of partial (1/12) substitution of W by Cu and partial (11/12) occupancy of terminal O. W, O, P and Cs atoms are shown in grey, red, purple and green spheres, respectively.

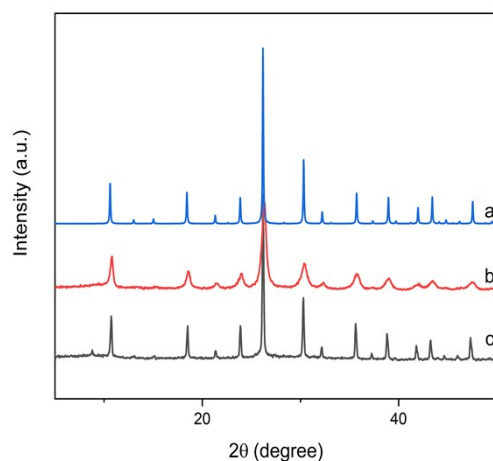

Fig. S5 Simulated powder XRD pattern of **3-Cs** (a), experimental powder XRD patterns of **3-Cs** (b) and **1-Cs** (c).

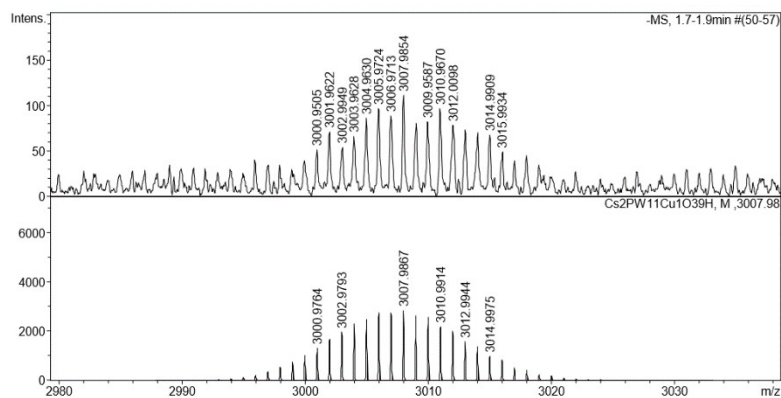

Fig. S6 The experimental (above) and simulated (below) ESI-MS peak of  $[\text{Cs}_2\text{HCuPW}_{11}\text{O}_{39}]^-$ .

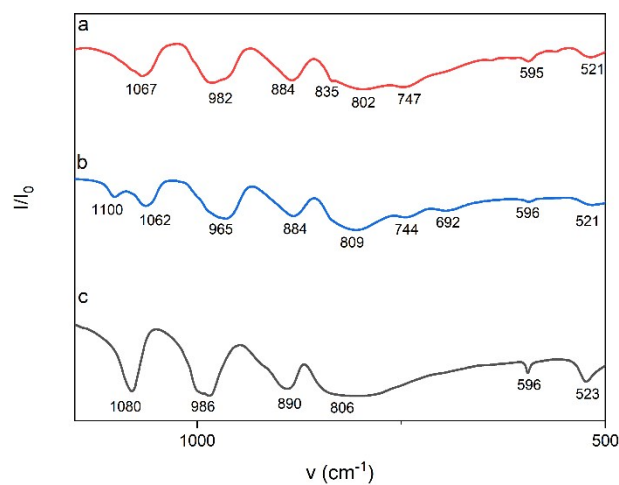

Fig. S7 IR spectra of **1-Cs** (a), **2-Cs** (b) and **3-Cs** (c) in the range of 1150~500  $\text{cm}^{-1}$ .

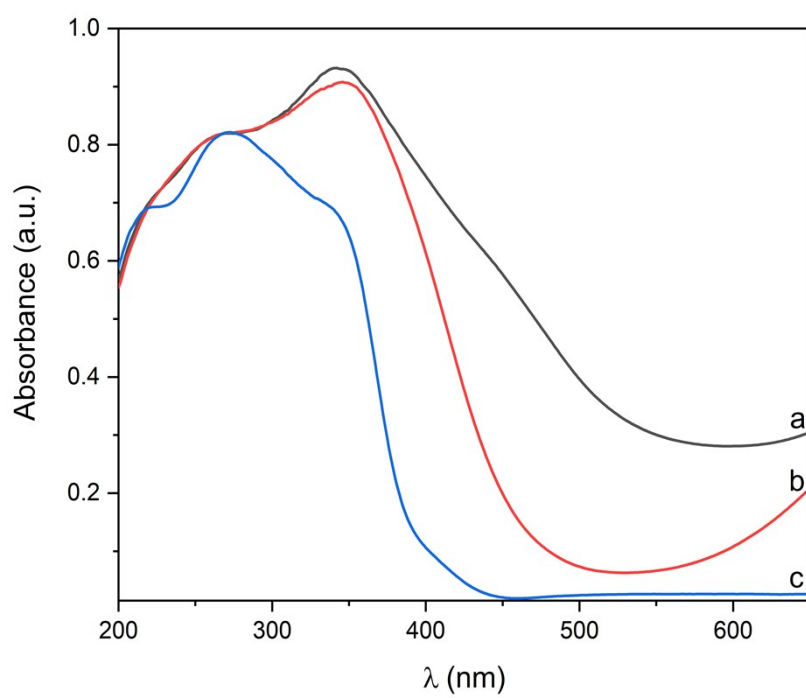

Fig. S8 UV-Vis diffuse reflectance spectra of **1-Cs** (a), **2-Cs** (b) and **3-Cs** (c).

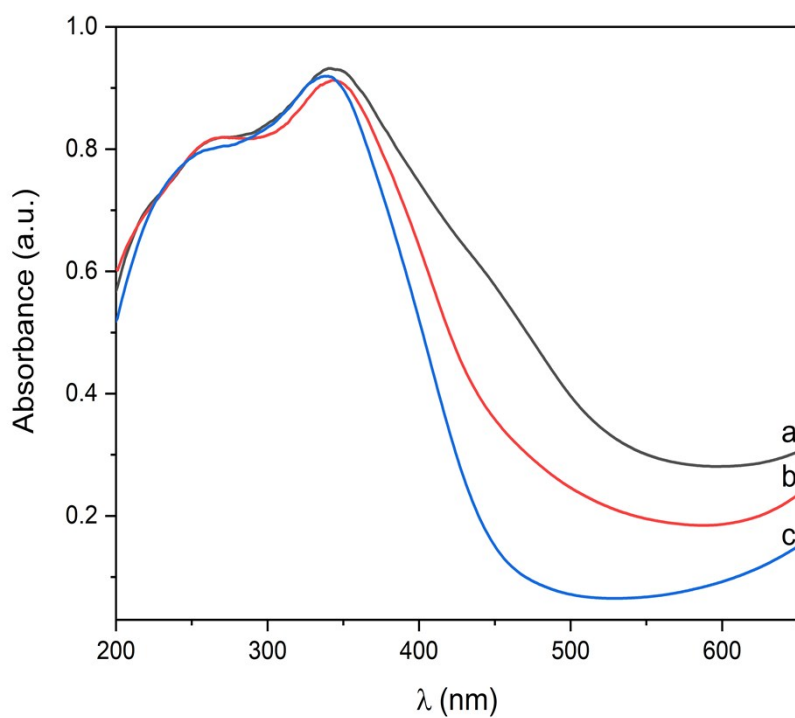

Fig. S9 UV-Vis diffuse reflectance spectra of **1-Cs** after 0 (a), 4 (b) and 9 (c) day(s).

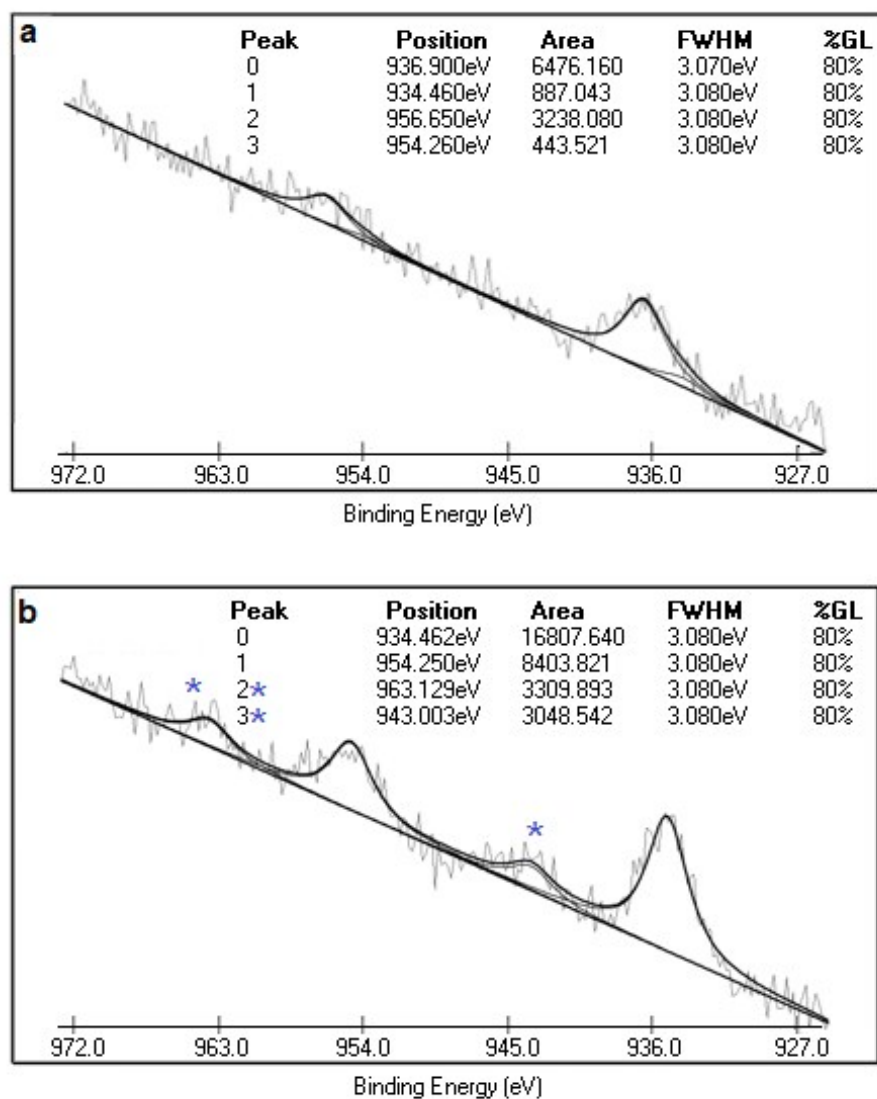

Fig. S10 Cu 2p XPS spectra of **1-Cs** (a) and **2-Cs** (b). Peaks marked with asterisks represent satellite peaks of  $\text{Cu}^{2+}$ .

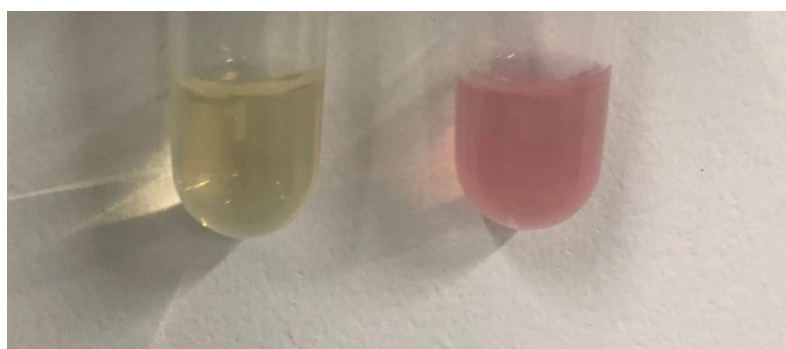

Fig. S11 Solution of  $\text{Na}_5[\text{Mn}^{\text{II}}\text{PW}_{11}\text{O}_{39}(\text{OH}_2)] \cdot 15\text{H}_2\text{O}$  after mixed with **2-Cs** (left) and **1-Cs** (right) followed with filtering.

**Reference:**

- A1. G. M. Brown, M. R. Noe-Spirlet, W. R. Busing and H. A. Levy, *Acta Crystallogr. B*, 1977, **33**, 1038-1046.
- A2. J. A. Santos, *Proc. Roy. Soc. A*, 1935, **150**, 309-322.
